# Supplementary material for: Decoration of nanocarbon solids with magnetite nanoparticles: towards microwave metamaterial absorbers
Source: Royal Society of Chemistry journal article supplement (doi:10.1039/c5tc03654b), 2016-01-01
Supplement: c5tc03654b1.pdf [file c5tc03654b1.pdf]

## Electronic Supplementary Information (ESI)

### Decoration of nanocarbon supports with magnetite nanoparticles: application to microwave-responsive metamaterials

Francisco Mederos-Henry<sup>a</sup>, Benoît P. Pichon<sup>b</sup>, Yzaora Tchuitio Yagang<sup>a</sup>, Arnaud Delcorte<sup>c</sup>, Christian Bailly<sup>c</sup>, Isabelle Huynen\*<sup>d</sup> and Sophie Hermans\*<sup>a</sup>

<sup>a</sup> Institute of Condensed Matter and Nanosciences (IMCN), Division of Molecules, Solids and Reactivity (MOST), Place Louis Pasteur 1, Université catholique de Louvain, B-1348 Louvain-la-Neuve, Belgium. E-mail : Sophie.Hermans@uclouvain.be.

<sup>b</sup> Institut de Physique et Chimie des Matériaux de Strasbourg, UMR CNRS-UdS 7504, 23 rue du Loess – BP 43, 67034 Strasbourg Cedex 2, France.

<sup>c</sup> Institute of Condensed Matter and Nanosciences (IMCN), Division of Bio and Soft Matter (BSMA), Croix du Sud 1, Université catholique de Louvain, B-1348 Louvain-la-Neuve, Belgium.

<sup>d</sup> Institute of Information and Communication Technologies, Electronics and Applied Mathematics (ICTEAM), Place du Levant 3, Université catholique de Louvain, B-1348 Louvain-la-Neuve, Belgium. E-mail : isabelle.huynen@uclouvain.be

#### 1. Reactants specifications

##### Nanocarbon supports

| Name                                   | Specification | Company                          | Country     |
|----------------------------------------|---------------|----------------------------------|-------------|
| Multi-walled carbon nanotubes (MWCNTs) | NC3100        | Nanocyl                          | Belgium     |
| Graphene oxide (GO)                    | -             | Nanoinnova<br>Technologies<br>SL | Spain       |
| Reduced graphene oxide (rGO)           | -             |                                  |             |
| Graphene nanoplatelets (GNPs)          | TIMREX BNB90  | TIMCAL                           | Switzerland |

##### Other reactants

| Name                            | Specification                      | Company       | Country |
|---------------------------------|------------------------------------|---------------|---------|
| (3-aminopropyl)trimethoxysilane | 97%                                | Sigma-Aldrich | Germany |
| Iron (III) acetylacetonate      | 97%                                |               |         |
| Iron (III) chloride hexahydrate | puriss. p.a., Reag. Ph. Eur., ≥99% |               |         |
| Thionyl chloride                | ReagentPlus®, ≥99%                 |               |         |
| Triethylene glycol              | ReagentPlus®, ≥99%                 |               |         |
| Ethylene glycol                 | Spectrophotometric grade, 99+%     | Alfa Aesar    | Germany |
| Hydrazine monohydrate           | 99+%                               |               |         |
| Iron (II) chloride tetrahydrate | Reagent grade, 99%                 |               |         |
| Polyethylene glycol 2000        | -                                  |               |         |
| Tetraethoxysilane               | 99.9%                              |               |         |
| Tetramethylammonium hydroxide   | 25% w/w aq. soln., 99.9999%        | Merck         | Germany |
| Polyethylene glycol 400         | Synthesis grade                    |               |         |
| Ethanol                         | Technisolv                         | VWR           | Belgium |
| Hydrochloric acid               | AnalaR NORMAPUR                    |               |         |
| Nitric acid                     | 65%, AnalaR NORMAPUR               |               |         |
| Sodium Hydroxide                | AnalaR NORMAPUR                    |               |         |
| Toluene                         | AnalaR NORMAPUR                    |               |         |

## 2. Covalent linkage of functionalized core-shell nanoparticles and graphene oxide acyl chloride derivative (COV).

The nature of the linkage existing between the graphenic surface and the silica-coated MaNPs in a COV nanocomposite was characterized by XPS. As can be observed in Figure 1, the  $N_{1s}$  photopeak can be fitted with two components located at binding energies of 402 eV and 399 eV which are attributable to an  $(C=O)-NH-C$  amide bond [1] or to an amine's  $N-H_2$  [2], respectively. Furthermore, according to this analysis, the amide component is more abundant, given that its contribution to the  $N_{1s}$  peak area is approximately 74%.

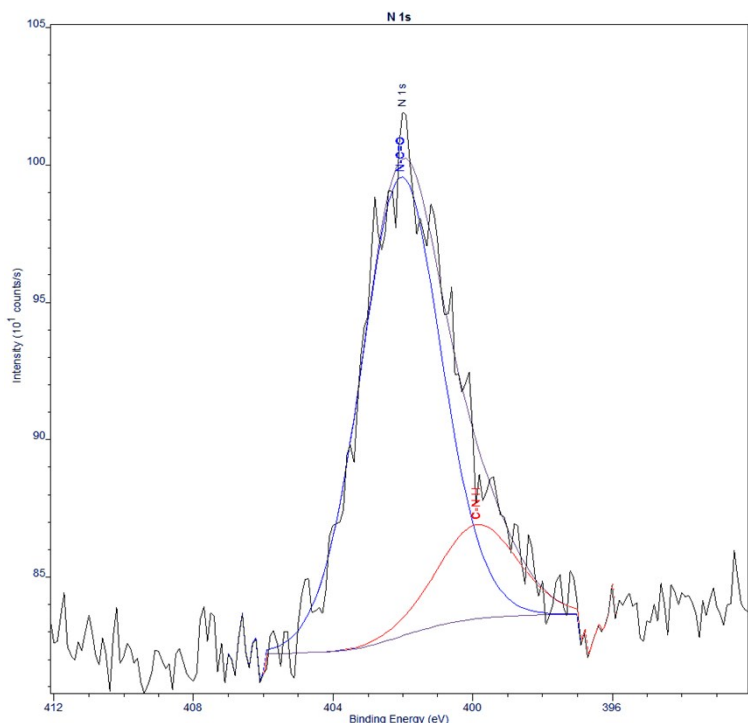

**Figure S1-** XPS spectra ( $N_{1s}$  peak) of a COV product. The peak can be fitted with two components attributable to an  $(C=O)-NH-C$  amide bond (blue) or to an amine's  $N-H_2$  (red).

The formation of the amide bond was also detected when fitting the nanocomposites'  $C_{1s}$  peak (see Figure 2). Before the reaction, GO's  $C_{1s}$  peak is fitted with five components: Carom,  $C-(C,H)$ ,  $C-O$ ,  $C=O/O-C-O$  and  $(C=O)-OH$ . On the other hand, when analysing the COV nanocomposite, an additional component attributable to an  $(C=O)-NH-C$  amide bond is required in order to fit the peak shoulder located around 288 eV [3].

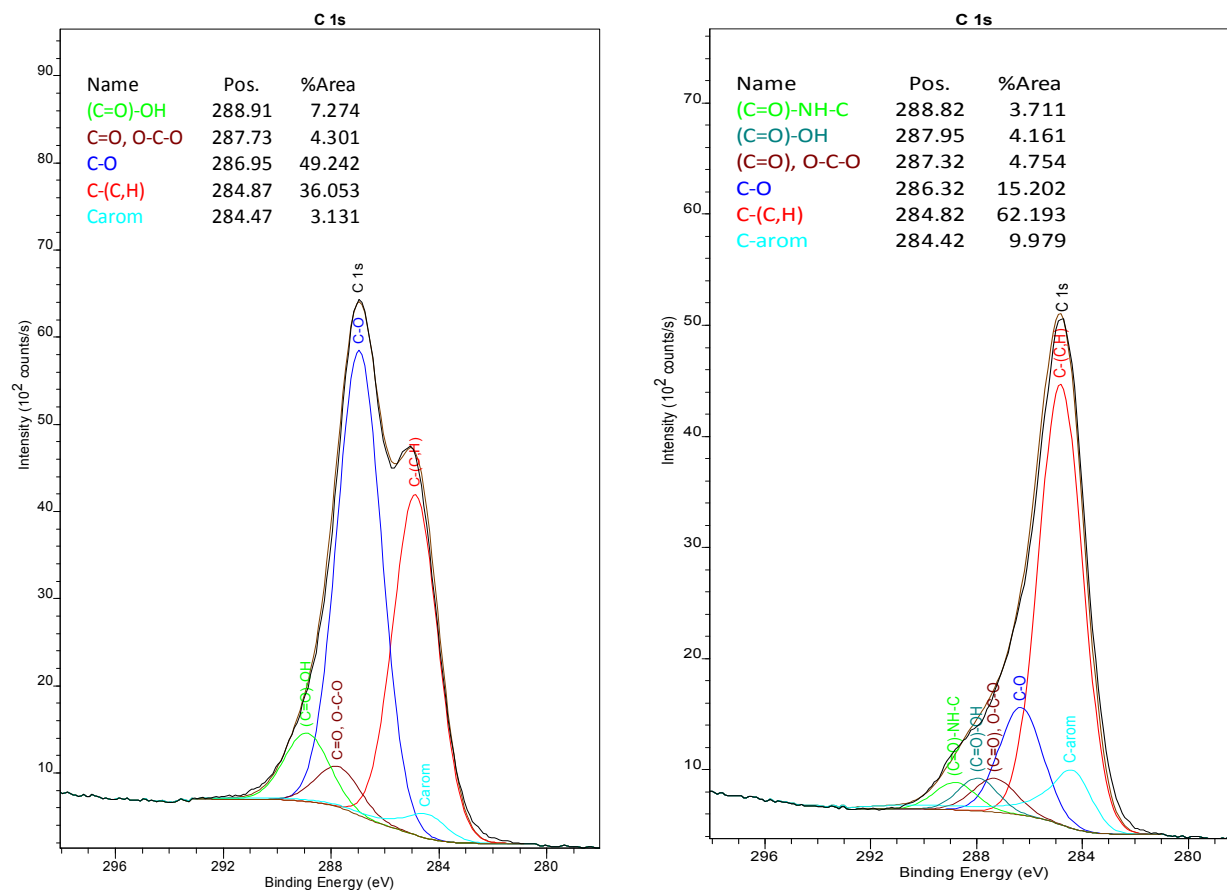

Figure S2 XPS spectra of GO (left) and the COV nanocomposite product (right).

### 3. TEM images of tethered core-shell nanoparticles

TEM inspection of the M@Si product, prior to its functionalization and covalent linkage to an acyl-modified GO support, proves that magnetite nanoparticles have been effectively covered with a thin silica layer.

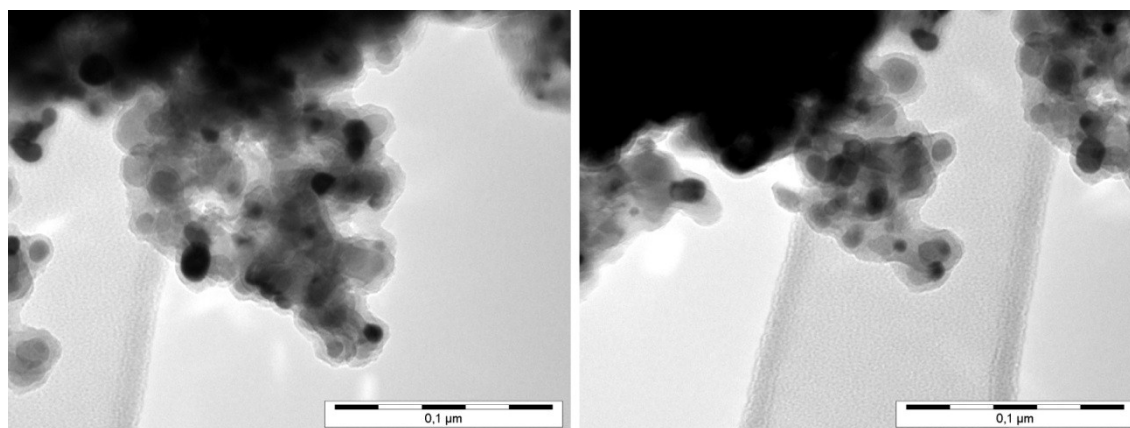

Figure S3 – TEM images of the M@Si core-shell nanoparticles. Darker magnetite nanoparticles of different sizes and morphologies can be observed, surrounded by a light-grey thin shell of silica.

#### 4. Oxygenated functions abundance in the different graphenic supports as determined by XPS.

XPS was performed on the different starting nanocarbon supports. The C<sub>1s</sub> peak was fitted using aromatic (C-arom), alkyl (C-(C,H)), alcohol (C-O), carbonyl/ether (C=O, O-C-O) and acyl ((C=O)-OH) components. The quantification of the different components' contribution to the C<sub>1s</sub> peak area indicate that the total amount of oxygenated functions decreases in the order: GO>rGO>GNPs (see Figure 3).

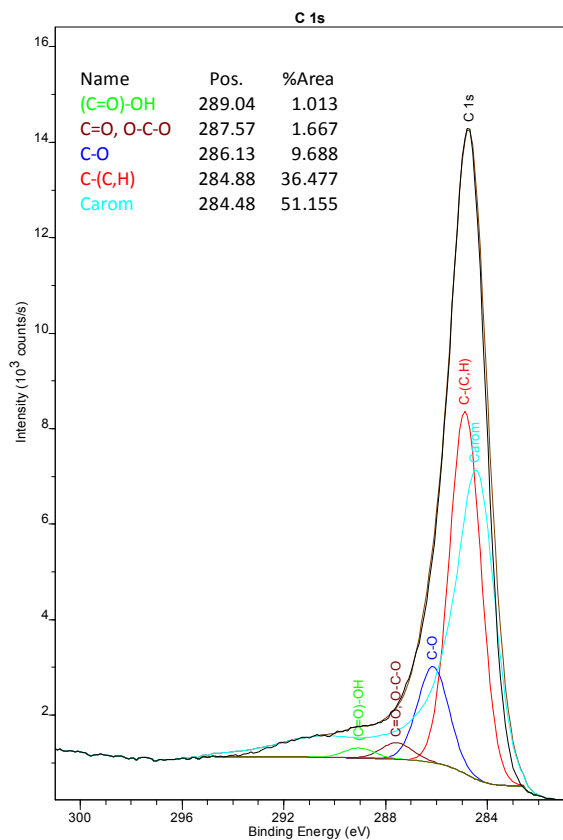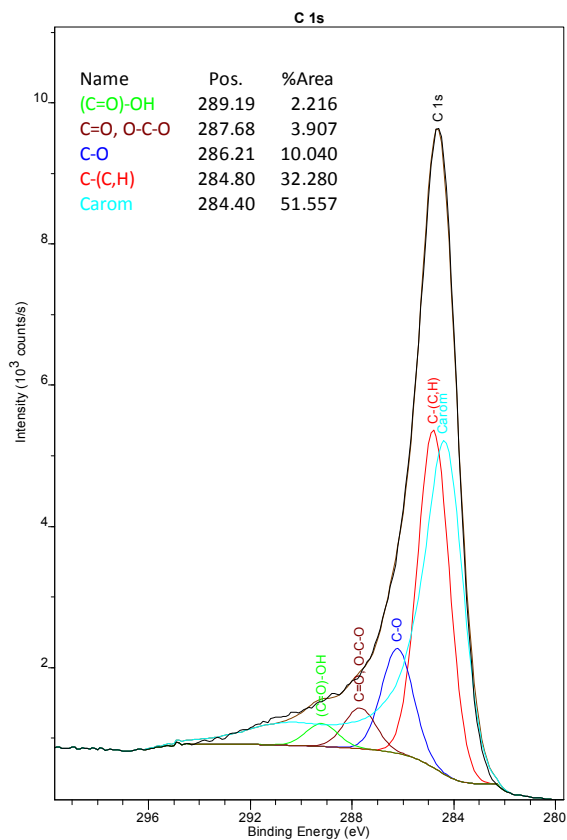

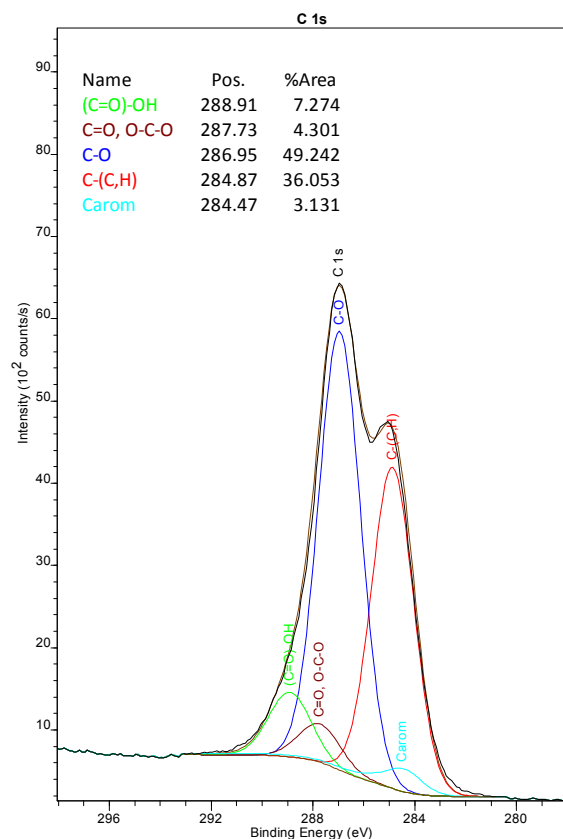

**Figure S3** XPS spectra for the C1s peak of a) GNPs (top, left); b) rGO (top, right) and c) GO (bottom, left).

## 5. TGA analysis of a series of samples synthesized by the SOLV-A method.

SOLV-A method was used to produce 750 mg of a MaNPs@GNPs (50% intended Fe/GNPs loading rate (LR)). The used autoclave vessel capacity is limited to 250 mL, thus being insufficient to synthesize this amount in a single experiment. The nanocomposite was therefore produced in 3 separate batches. TGA analyses performed on each batch show that the amount of loaded MaNPs is extremely similar from one batch to the other.

| MaNPs@GNPs (Timcal) LR (% w/w) as determined by TGA |      |      |      |
|-----------------------------------------------------|------|------|------|
|                                                     | B1   | B2   | B3   |
| %Fe (% w/w)                                         | 29.1 | 29.3 | 28.7 |

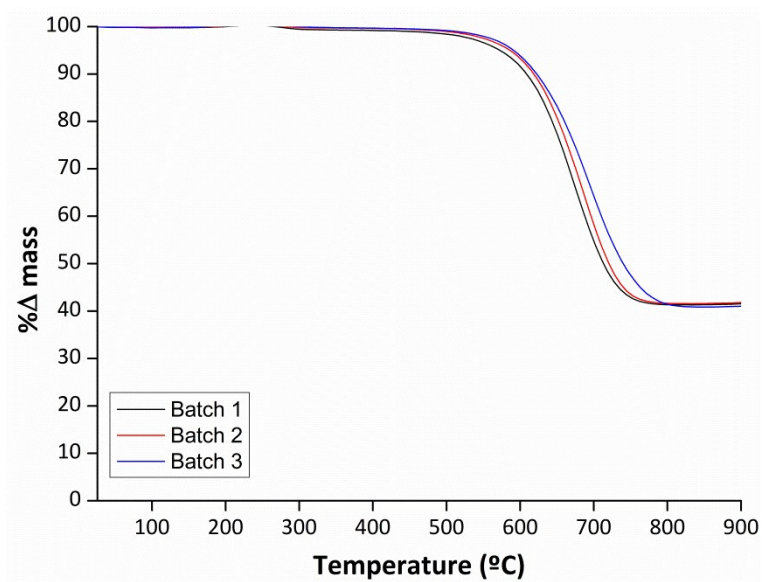

**Figure S4** Thermograms for the thermal decomposition under air of the different MaNPs@GNPs batches produced with the SOLV-A technique.

## 5. References

1. D.N. Hendrickson, J.M. Hollander and W.L. Jolly, *Inorg. Chem.*, 1969, **8**(12), 2642-2647.
2. E.T. Kang, K.G. Neoh, X. Zhang, K.L. Tan and D.J. Liaw, *Surf. Interface Anal.*, 1996, **24**, 51-58.
3. P.G. Rouxhet and M.J. Genet, *Surf. Interface Anal.*, 2011, **43**, 1453-1470.
